# Supplementary material for: Calponin-homology domain mediated bending of membrane-associated actin filaments
Source: eLife journal article supplement (doi:10.7554/elife.61078), 2021-07-16
Supplement: figures [file elife-61078-figures-v2.pdf]

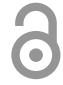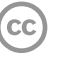

---

## Figures and figure supplements

Calponin-homology domain mediated bending of membrane-associated actin filaments

**Saravanan Palani et al**

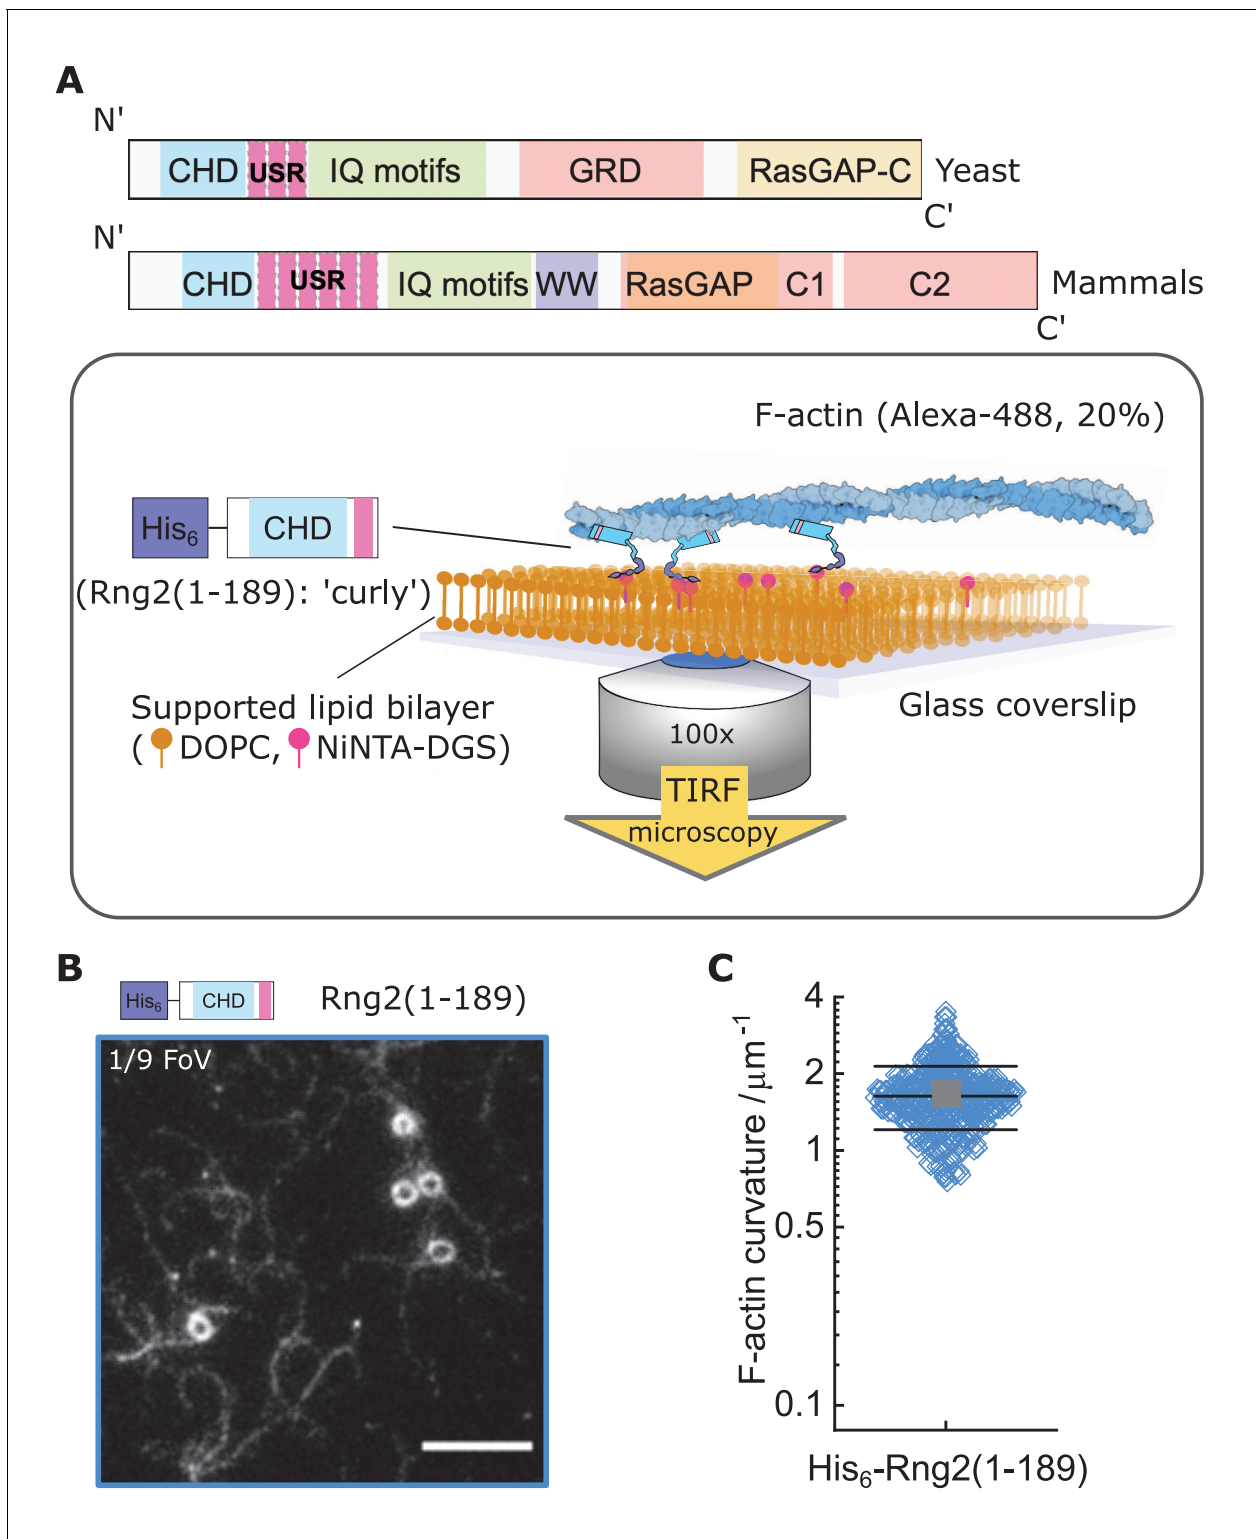

**Figure 1.** Formation of actin filament rings by membrane tethered curly ( $\text{His}_6\text{-Rng2}(1\text{-}189)$ ). (A) Schematic representation of (top) the IQGAP proteins Rng2 (yeast, *S. pombe*) and IQGAP1 (mammals, *H. Sapiens*) and (bottom) the experimental setup used in this study; CHD - Calponin Homology Domain, USR – Unstructured Region, GRD - GAP Related Domain, RasGAP – Ras GTPase Activating Protein, WW – tryptophan containing protein domain. (B) TIRF microscopy image of actin filaments (Alexa488,  $C_{\text{actin}} = 100 \text{ nM}$ ) bound to SLB tethered  $\text{His}_6\text{-curly}$  ( $C_{\text{curly}} = 10 \text{ nM}$ ); shown is 1/9 field of view (FoV), scale bar  $5 \mu\text{m}$ . (C) Curvature measurements of actin filament rings and curved segments; shown are the individual data points and their mean  $\pm$  s.d.;  $N = 425$  obtained from five field of views from each of four independent experiments.

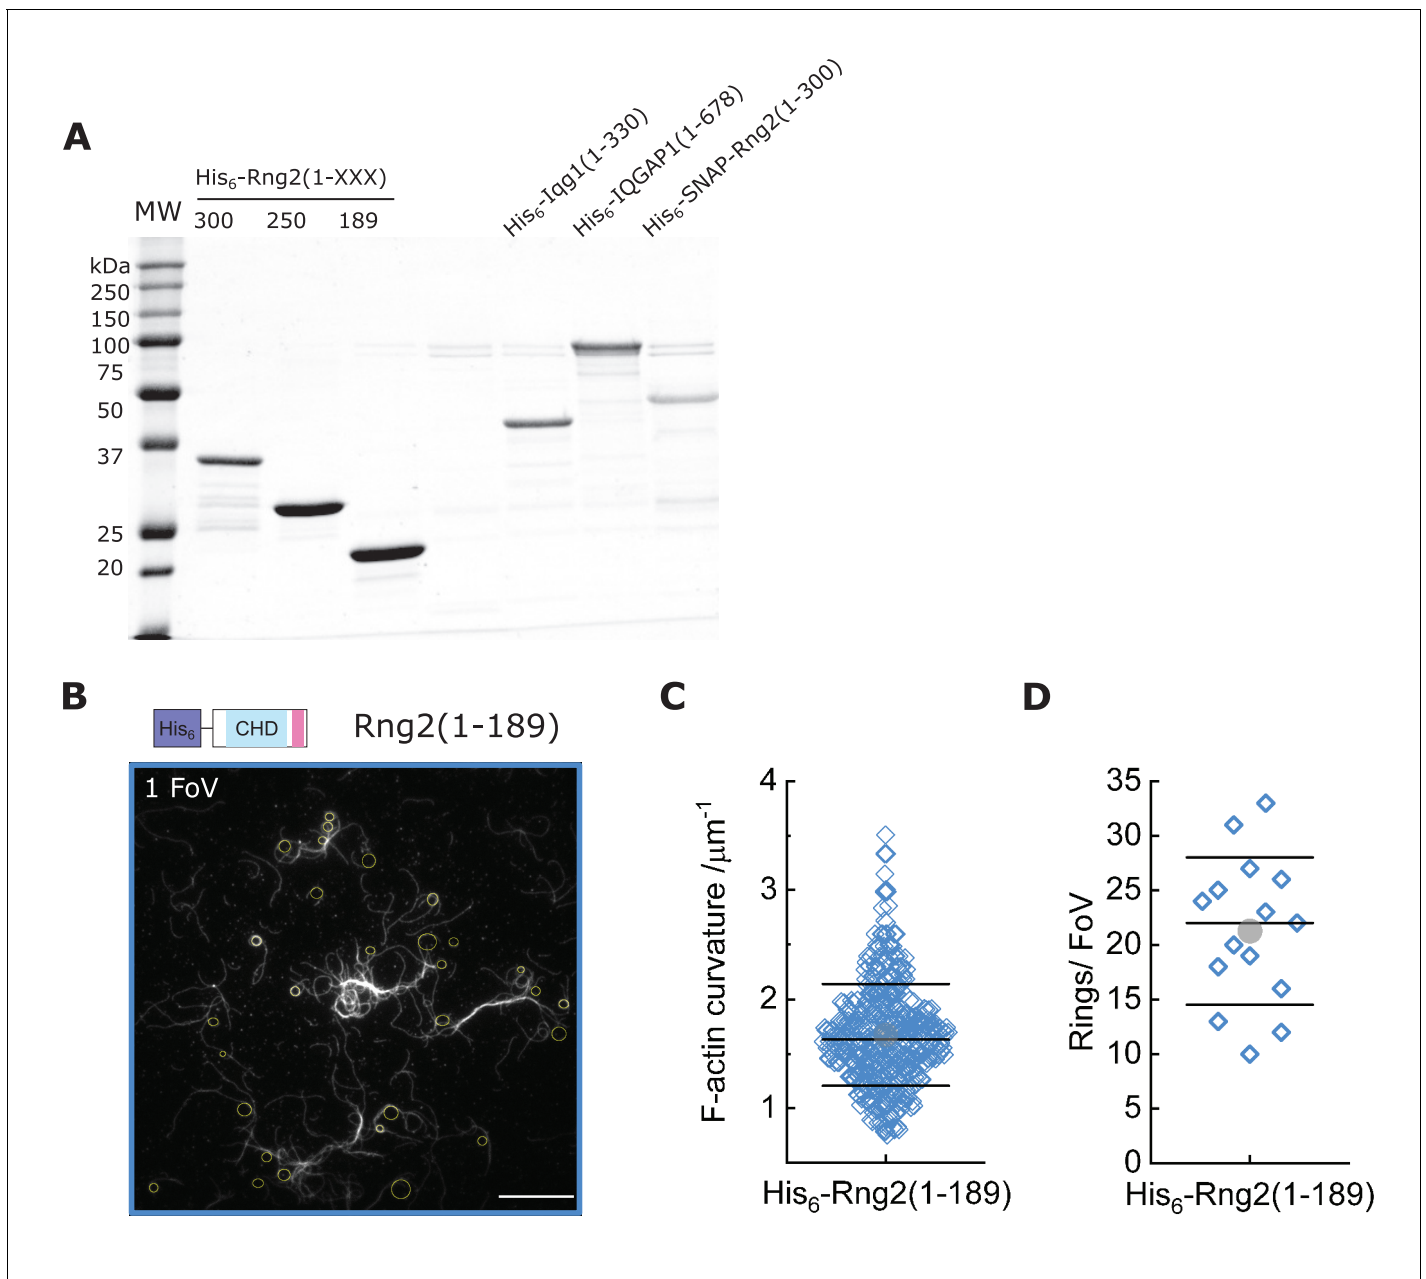

**Figure 1—figure supplement 1.** Protein purification and measurements of actin rings induced by curly. (A) Coomassie stained SDS-PAGE of the different constructs used in this study; MW indicates molecular weight markers. (B) TIRF microscopy image (1 FoV = Field of View) of actin filaments (Alexa488) bound to SLB tethered His<sub>6</sub>- curly; yellow circles/ellipses show curvature measurements; scale bar 10  $\mu\text{m}$ . (C) Box plot of actin filament curvatures induced by SLB tethered His<sub>6</sub>- curly (same as in **Figure 1C** but with linear scale). (D) Box plot depicting the number of full actin rings per field of view (FoV) induced by SLB tethered His<sub>6</sub>-Rng2(1-189); N = 15 FoVs from three independent samples.

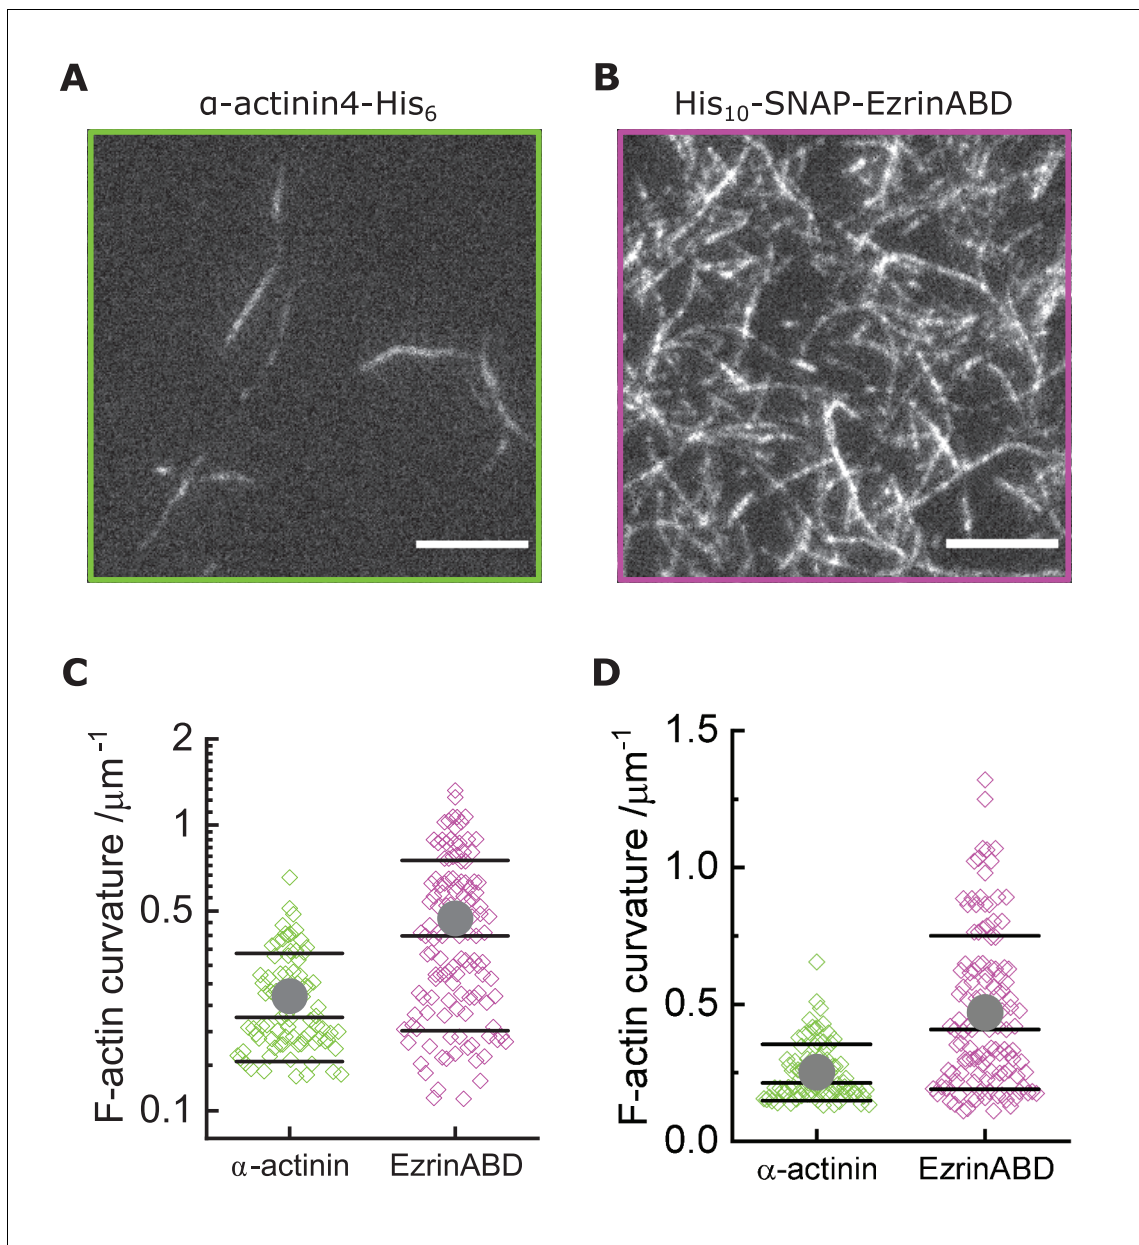

**Figure 1—figure supplement 2.** Other actin binding proteins do not bend actin filaments. (A) TIRF microscopy image of actin filaments (Alexa488,  $C_{\text{actin}} = 100 \text{ nM}$ ) bound to SLB tethered  $\alpha$ -actinin-His<sub>6</sub> ( $C_{\alpha\text{-act}} = 10 \text{ nM}$ ); scale bar  $5 \mu\text{m}$ . (B) TIRF microscopy image of actin filaments (Alexa488,  $C_{\text{actin}} = 100 \text{ nM}$ ) bound to SLB tethered His<sub>10</sub>-EzrinABD ( $C_{\text{EzrABD}} = 10 \text{ nM}$ ); scale bar  $5 \mu\text{m}$ . (C) Curvature measurements of actin filament rings and curved segments;  $\alpha$ -actinin-His<sub>6</sub>:  $N = 85$  obtained from 10 field of views from four individual experiments; His<sub>10</sub>-EzrinABD:  $N = 127$  obtained from nine field of views from three individual experiments. (D) Same data as (C) but in linear scale.



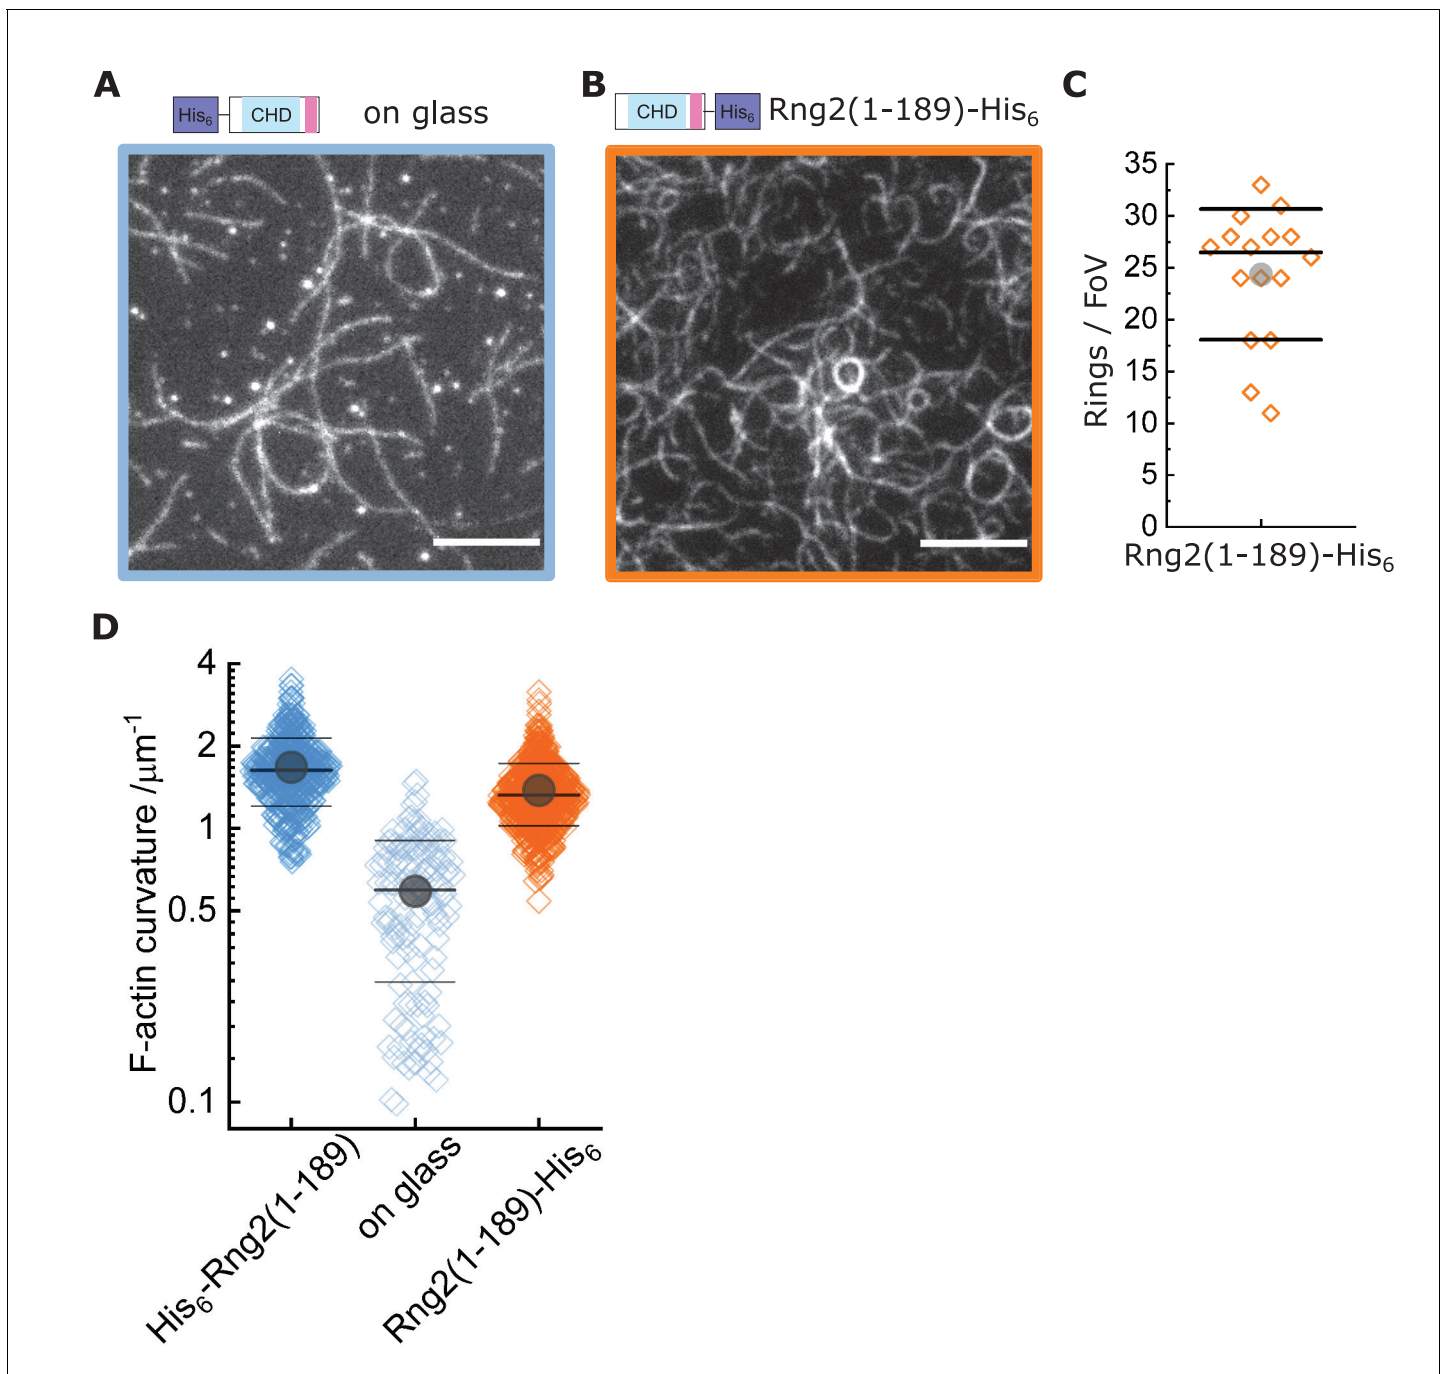

**Figure 2.** Actin bending is independent of curly orientation but requires lipid membrane tethering. TIRF microscopy images of actin filaments (Alexa488,  $C_{\text{actin}} = 100 \text{ nM}$ ) bound to. (A) Glass adsorbed His<sub>6</sub>-curly ( $C_{\text{curly}} = 10 \text{ nM}$ ); N = 138 from nine field of views from each of three independent experiments. (B) SLB bound Rng2(1-189)-His<sub>6</sub> ( $C_{\text{curly-His}} = 10 \text{ nM}$ ); N = 658 from 13 field of views from each of four experiments; images show 1/9 field of view (FoV); scale bars: 5  $\mu\text{m}$ . (C) Number of full actin rings per field of view induced by SLB tethered Rng2(1-189)-His<sub>6</sub>; N = 16 FoVs from three independent samples. (D) Comparison of curvature measurements of actin filament rings and curved segments; diamonds represent individual measurements, lines the median  $\pm$  standard deviation and the circle the mean value.

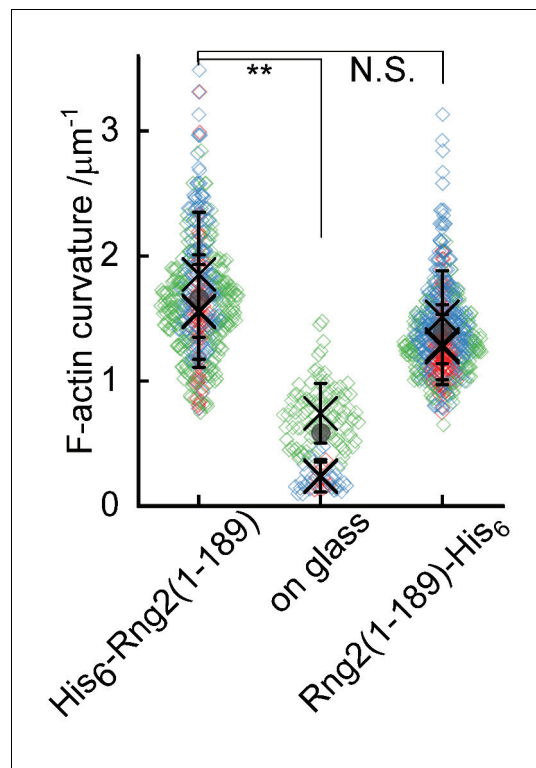

**Figure 2—figure supplement 1**, Statistical analysis of data in Figure 2. (A) Statistical comparison of average actin filament curvatures induced by Rng2 constructs as shown in **Figure 2D**; plotted are the mean value  $\pm$  standard deviation of independent experiments, comparison of mean values with Anova one-way test; \*\*:  $p < 0.005$ , N.S.: non-significant difference between the mean values.

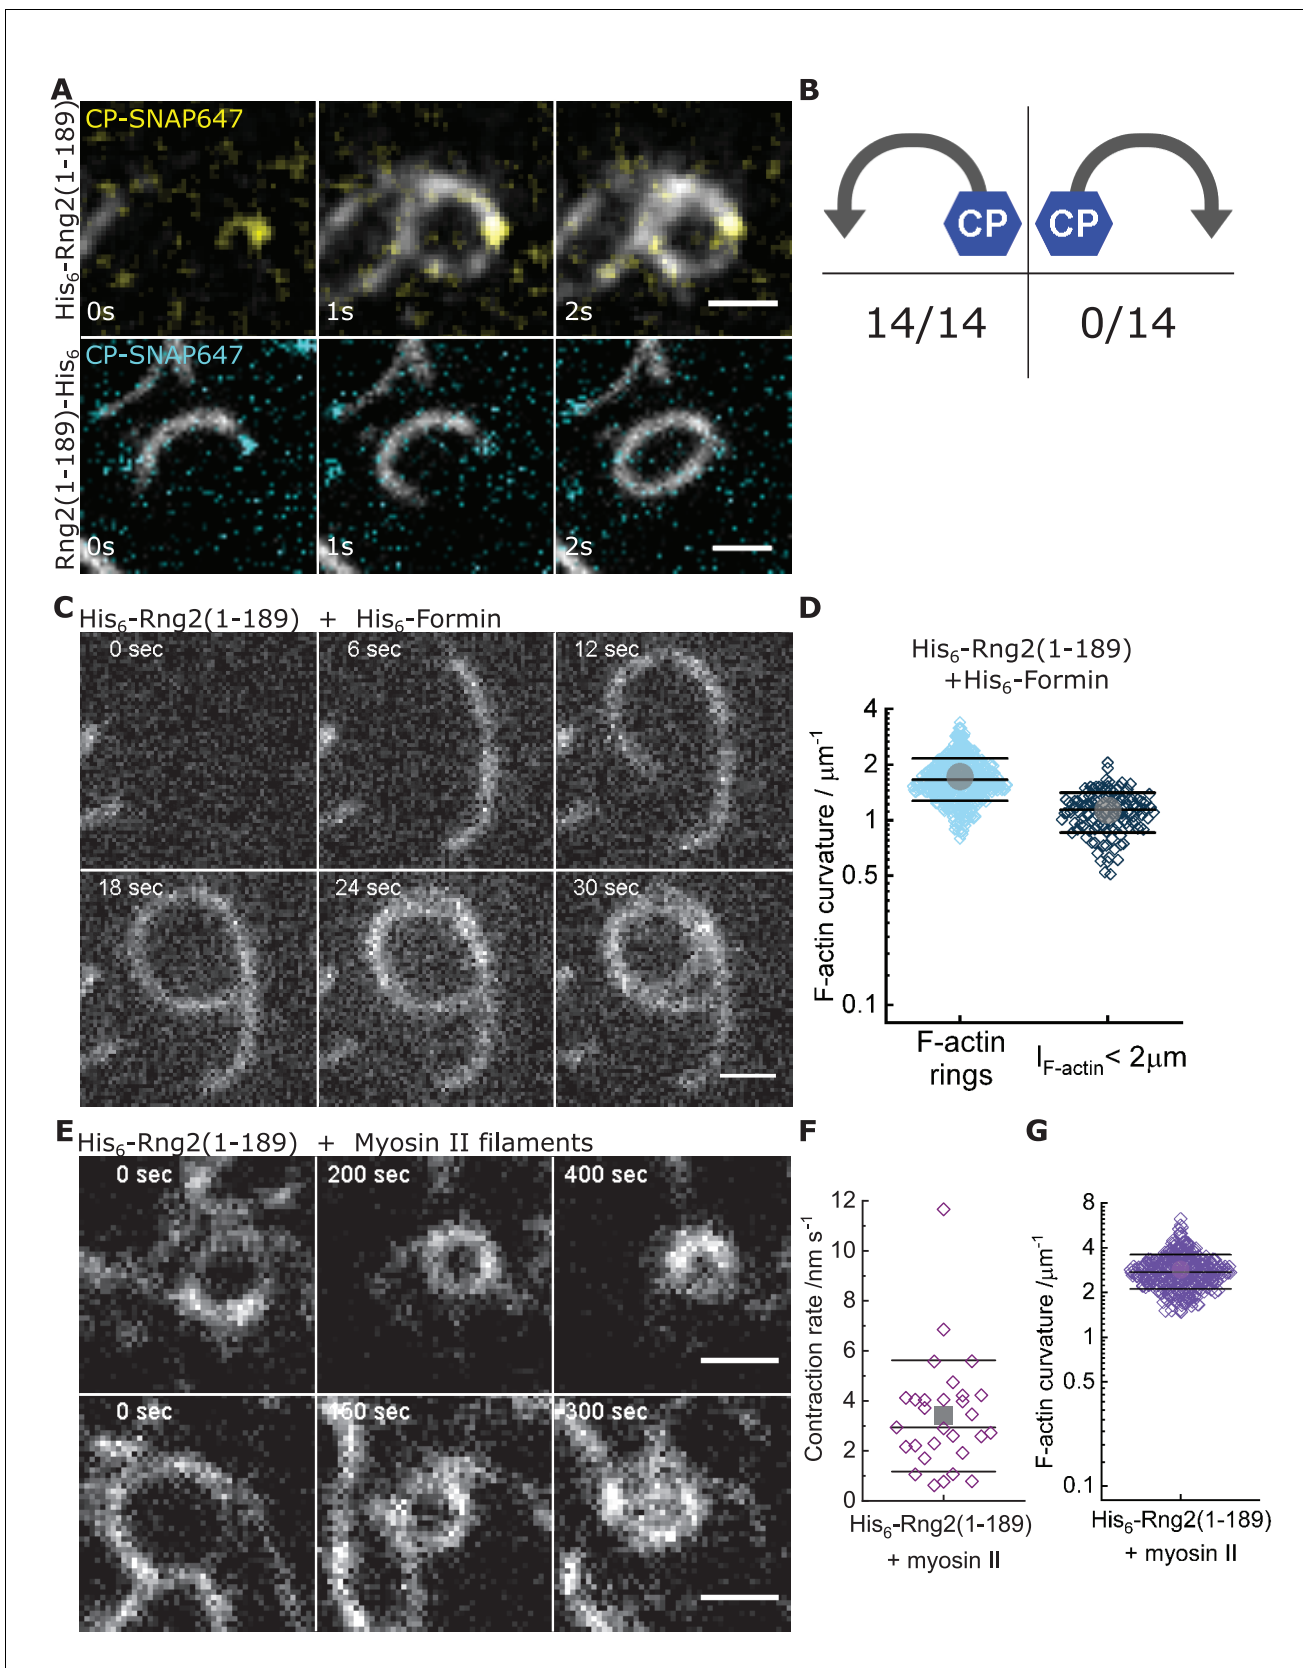

**Figure 3.** Curly recognizes actin filament orientation and enables actin ring contraction by myosin II. (A) TIRF microscopy images of actin filaments (Alexa488) ( $C_{\text{actin}} = 100 \text{ nM}$ ) with the plus end marked with SNAP647-tagged capping protein ( $C_{\text{CP}} = 2 \text{ nM}$ ) binding to His<sub>6</sub>-curly (top) and curly-His<sub>6</sub>. Figure 3 continued on next page

*Figure 3 continued*

(bottom) ( $C_{\text{curly}} = 10 \text{ nM}$ ); scale bar:  $1 \mu\text{m}$ . **(B)** Count of actin filament bending orientations with respect to the capping protein where individual actin filaments could be identified. **(C)** TIRF microscopy images of a polymerizing actin filament (Alexa488) driven by membrane tethered His<sub>6</sub>-formin in the presence of His<sub>6</sub>-curly; scale bar:  $1 \mu\text{m}$ . **(D)** Curvature measurements of actin filament rings (light blue) and curved short actin filaments ( $< 2 \mu\text{m}$ ; gray-blue); shown are the individual data points and their mean  $\pm$  s.d.;  $N_{\text{rings}} = 477$ ,  $N_{\text{short}} = 125$  from nine field of views of three independent experiments. **(E)** TIRF microscopy images of actin filament (Alexa488) ring contraction after addition of rabbit muscle myosin II filaments on His<sub>6</sub>-curly containing SLBs; scale bar:  $1 \mu\text{m}$ . **(F)** Average contraction rates of actin filament rings after addition of rabbit muscle myosin II filaments; shown are the individual data points and their mean  $\pm$  s.d.;  $N = 18$  from two individual experiments. **(G)** Curvature measurements of actin filament rings and curved segments 20 min after addition of rabbit muscle myosin II filaments; shown are the individual data points and their mean  $\pm$  s.d.;  $N = 342$  from 10 field of views of two individual experiments.

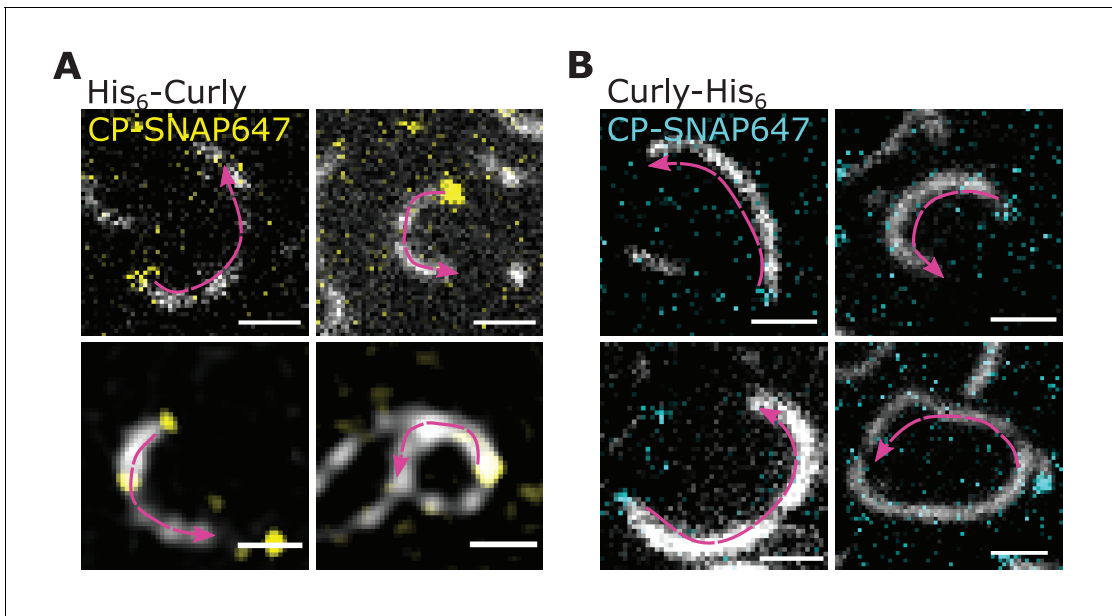

**Figure 3—figure supplement 1.** Curly recognizes actin filament orientation as visualised by labelled capping protein. (A) TIRF microscopy images of actin filaments (Alexa488) with the plus end marked with SNAP647-tagged capping protein binding to His<sub>6</sub>-Rng2(1-189); scale bar: 1  $\mu$ m. (B) TIRF microscopy images of actin filaments (Alexa488) with the plus end marked with SNAP647-tagged capping protein binding to Rng2(1-189)-His<sub>6</sub>; scale bar: 1  $\mu$ m. Arrows indicate the actin bending orientation.



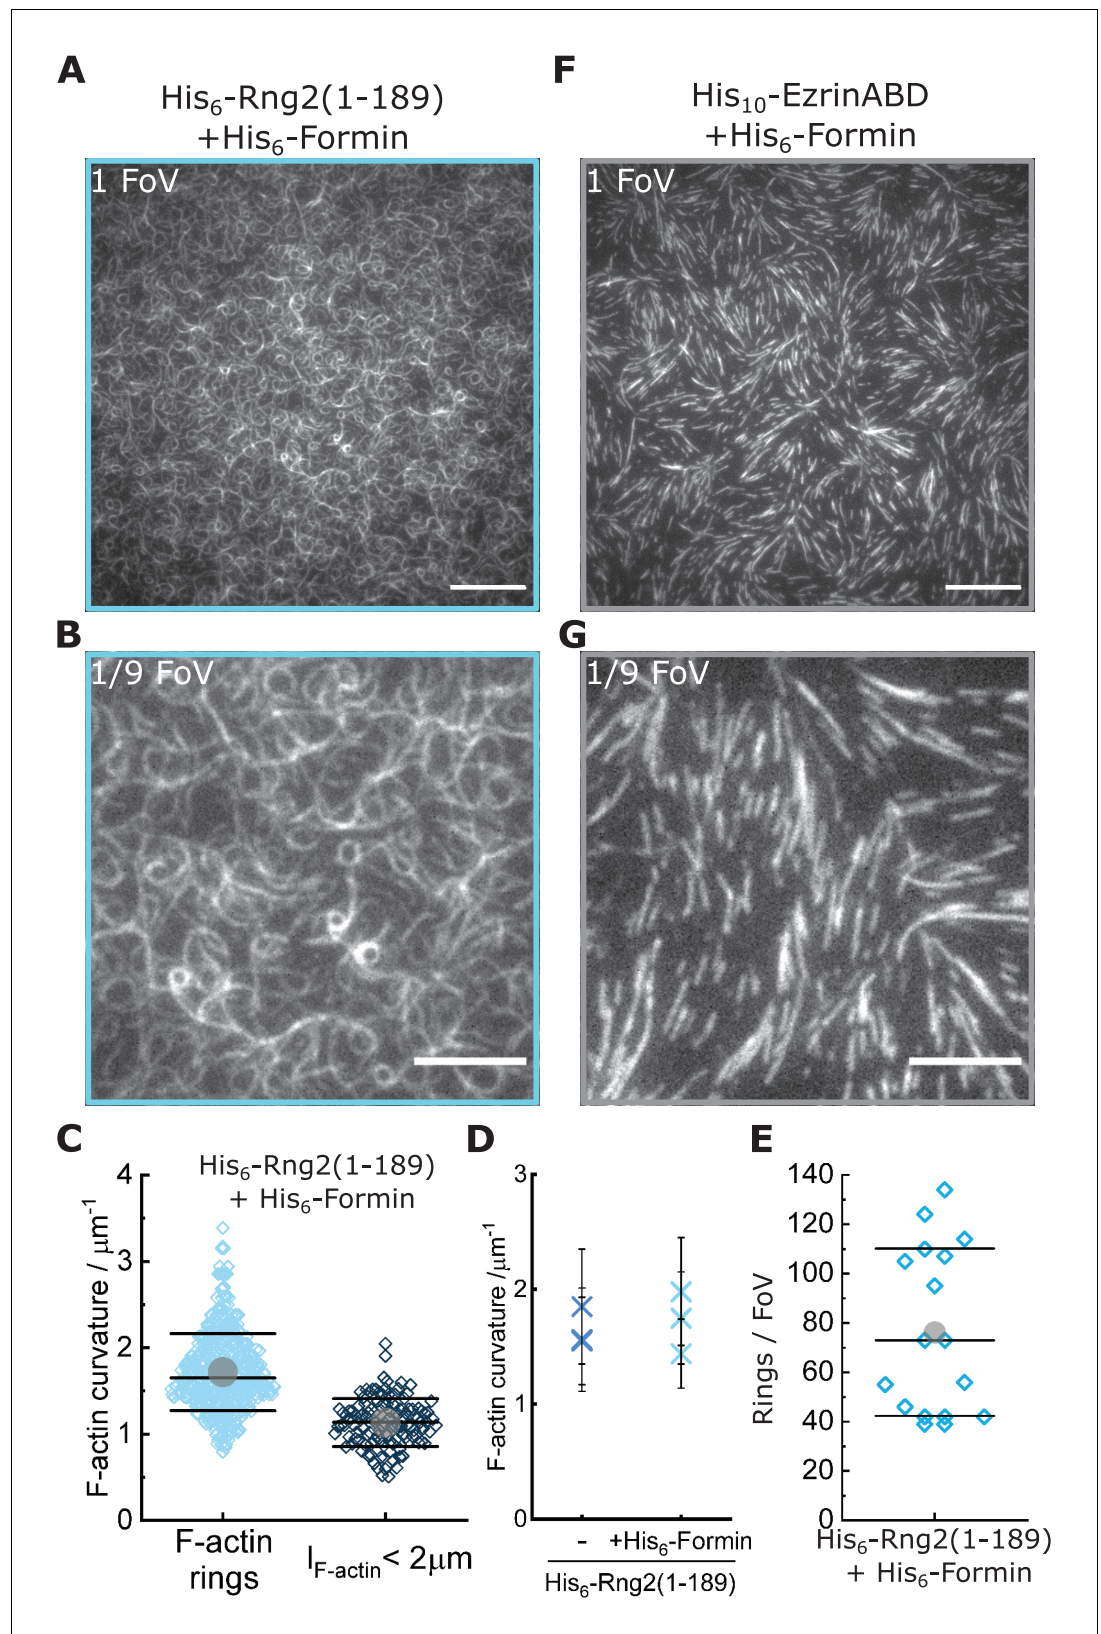

**Figure 3—figure supplement 2.** Curly induces actin bending in membrane tethered formin-generated actin filaments. (A) TIRF microscopy image (full field of view) of actin filaments (Alexa488) polymerized by membrane tethered His<sub>6</sub>-formin in the presence of His<sub>6</sub>-Rng2(1-189); scale bar: 10  $\mu\text{m}$ . (B) Zoom of (A) showing 1/9 of the field  
Figure 3—figure supplement 2 continued on next page



Figure 3—figure supplement 2 continued

of view; scale bar: 5  $\mu\text{m}$ . (C) Data from **Figure 3D** plotted in linear scale. (D) Comparison of mean actin ring curvatures of independent experiments with formin induced actin polymerization on curly containing membranes (data from **Figure 3D**) and with actin filaments landing on curly decorated membranes (data from **Figure 1C**) indicating that the curly induced ring curvature is independent of the type of actin polymerization. (E) Number of full actin rings per field of view when actin filaments are polymerized by membrane tethered His<sub>6</sub>-formin in the presence of His<sub>6</sub>-Rng2(1-189); N = 17 FoVs from three independent samples. (F) TIRF microscopy image (full field of view) of actin filaments (Alexa488) polymerized by membrane tethered His<sub>6</sub>-formin in the presence of His<sub>10</sub>-EzrinABD; scale bar: 10  $\mu\text{m}$ . (G) Zoom of (F) showing 1/9 of the field of view; scale bar: 5  $\mu\text{m}$ .

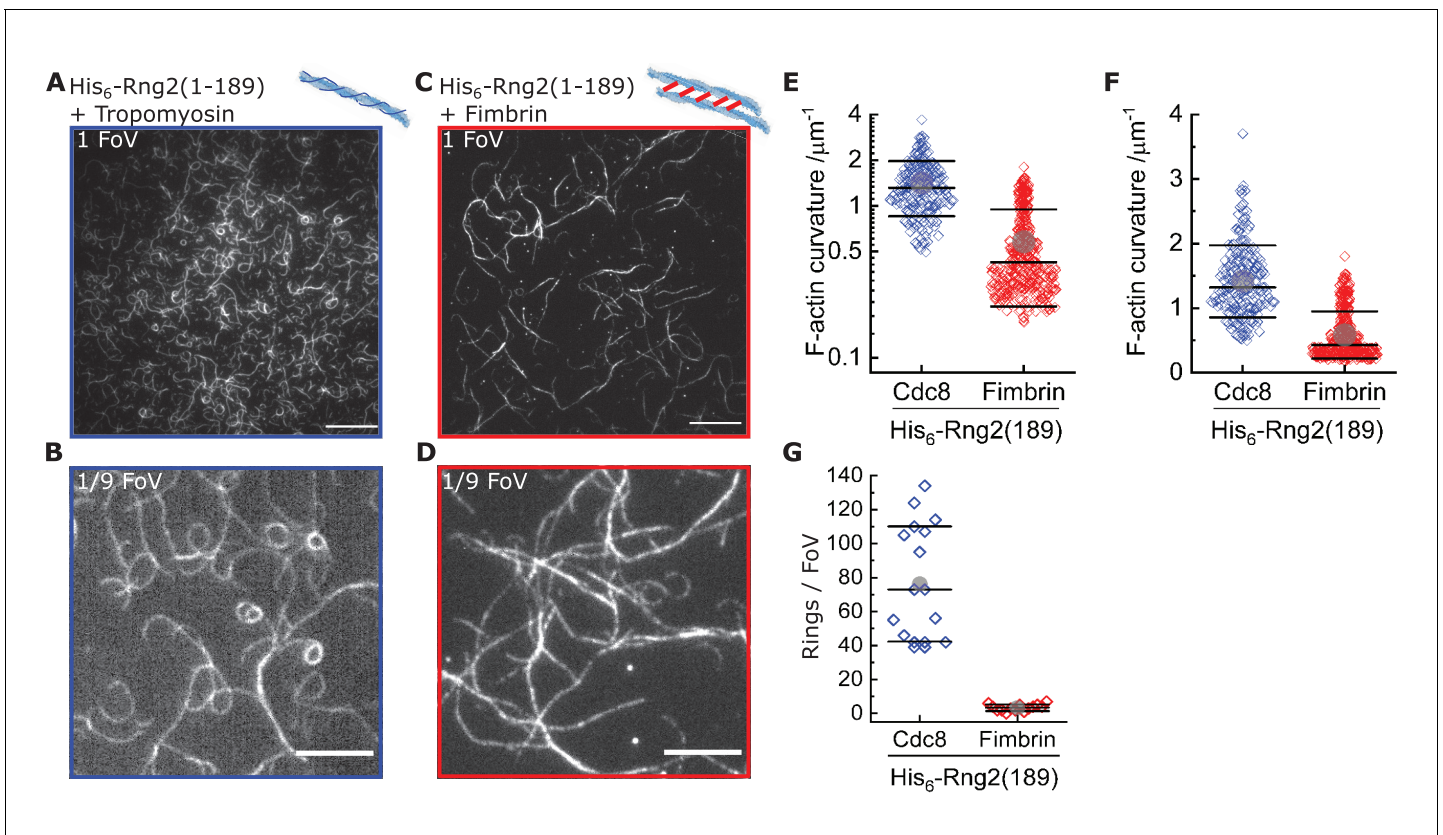

**Figure 3—figure supplement 3.** Tropomyosin supports actin bending by curly. (A) TIRF microscopy image (one field of view) of actin filaments (Alexa488) pre-incubated with tropomyosin (Cdc8) bound to membrane tethered His<sub>6</sub>-Rng2(1-189); scale bar: 10 μm. (B) TIRF microscopy image (1/9 field of view) of actin filaments (Alexa488) pre-incubated with tropomyosin (Cdc8) bound to membrane tethered His<sub>6</sub>-Rng2(1-189); scale bar: 5 μm. (C) TIRF microscopy image (representing one field of view) of actin filaments (Alexa488) pre-incubated with fimbrin bound to membrane tethered His<sub>6</sub>-Rng2(1-189); scale bar: 10 μm. (D) TIRF microscopy image (representing 1/9 field of view) of actin filaments (Alexa488) pre-incubated with fimbrin bound to membrane tethered His<sub>6</sub>-Rng2(1-189); scale bar: 5 μm. (E) Curvature measurements of actin filament rings and curved segments; Cdc8 (blue): N = 204 from nine field of views of three individual experiments; fimbrin (red): N = 407 from 20 field of views of three independent experiments. (F) Data from (E) plotted in linear scale. (G) Number of full actin rings per field of view, N(Cdc8) = 16, N(fimbrin) = 14 from three independent experiments.

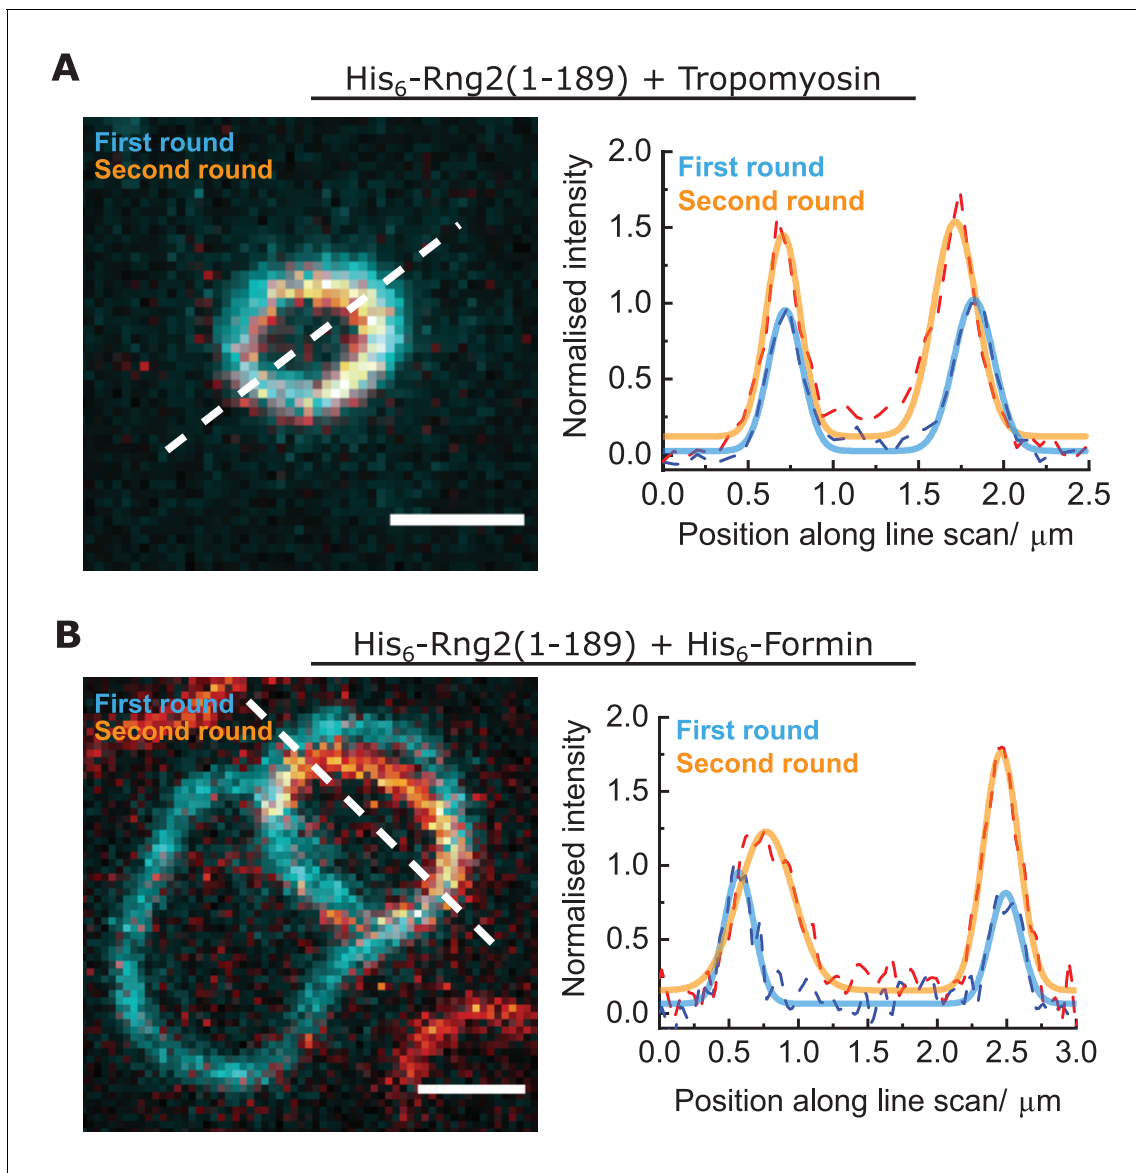

**Figure 3—figure supplement 4.** Curly can bend actin filaments multiple times into a ring. (A) Left: TIRF microscopy image overlay showing multiple ring formation of a tropomyosin coated actin filament (Alexa488) during binding to membrane tethered His<sub>6</sub>-Rng2(1-189); the first ring formed is colored in cyan, the second ring (in orange) was highlighted by subtracting the image of the first ring from the image stack; scale bar: 1  $\mu\text{m}$ . Right: Intensity line scan (three pixels width) along the white dashed line and corresponding Gaussian peak fits (colored dashed lines). (B) Left: TIRF microscopy image overlay showing multiple ring formation of a polymerizing actin filament (Alexa488) by membrane tethered His<sub>6</sub>-formin in presence of membrane tethered His<sub>6</sub>-Rng2(1-189); the first ring formed is colored in cyan, the second ring (in orange) was highlighted by subtracting the image of the first ring from the image stack; scale bar: 1  $\mu\text{m}$ . Right: Intensity line scans (three pixels width) along the white dashed line and corresponding Gaussian peak fits (colored dashed lines).

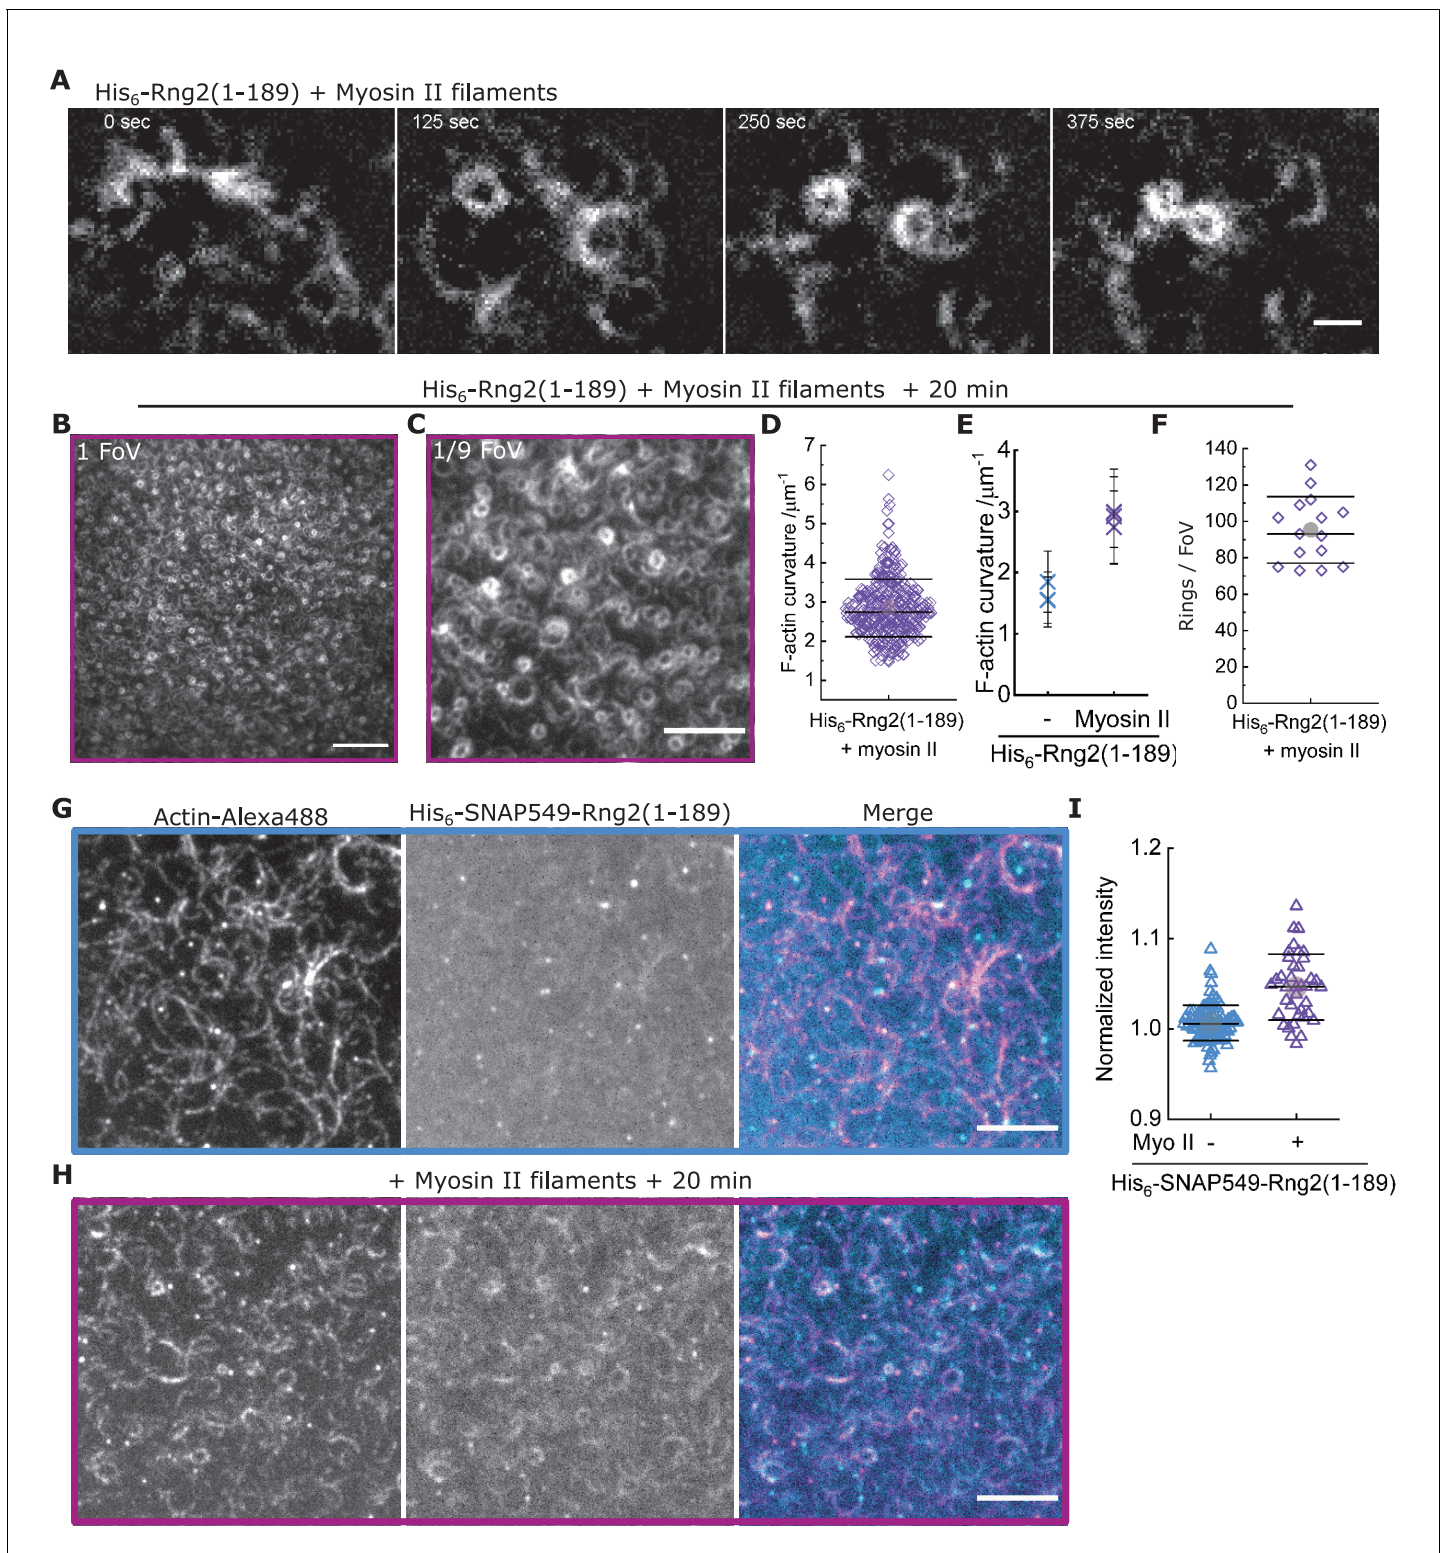

**Figure 3—figure supplement 5.** Muscle myosin II filaments contract curly induced actin rings even tighter. (A) TIRF microscopy image time series showing rabbit muscle myosin II filament driven ring formation, sliding and contraction of actin filaments (Alexa488) bound to membrane tethered His<sub>6</sub>-Rng2(1-189); scale bar: 1 μm. (B) TIRF microscopy image (representing one field of view) of actin filaments (Alexa488) 20 min after addition of rabbit muscle myosin II filaments on His<sub>6</sub>-curly containing SLBs; scale bar: 10 μm. (C) Zoom of (B) showing 1/9 field of view; scale bar: 5 μm. (D) Data from **Figure 3G** plotted in linear scale. (E) Comparison of mean actin ring curvatures of individual experiments induced by His<sub>6</sub>-Rng2(1-189) alone (data from **Figure 1C**) and in presence of rabbit muscle myosin II filament after 20 min of incubation (data from **Figure 3G**). (F) Number of full actin rings per field

Figure 3—figure supplement 5 continued on next page



*Figure 3—figure supplement 5 continued*

of view of actin filaments 20 min after addition of rabbit muscle myosin II filaments on His<sub>6</sub>-Rng2(1-189) containing SLBs; N = 15 from three independent experiments. (G) Two-color TIRF microscopy image of actin filaments (Alexa488, magenta) bound to membrane tethered fluorescently labeled His<sub>6</sub>-SNAP-Rng2(1-189) (Surface549, cyan) before, and (H) 20 min after addition of rabbit muscle myosin II filaments; scale bar 5 μm. (I) Box plot of His<sub>6</sub>-SNAP-Rng2(1-189) (Surface549) intensities under curved actin filaments before and after addition of rabbit muscle myosin II filaments; intensities were normalized to the average intensity of the entire field of view.

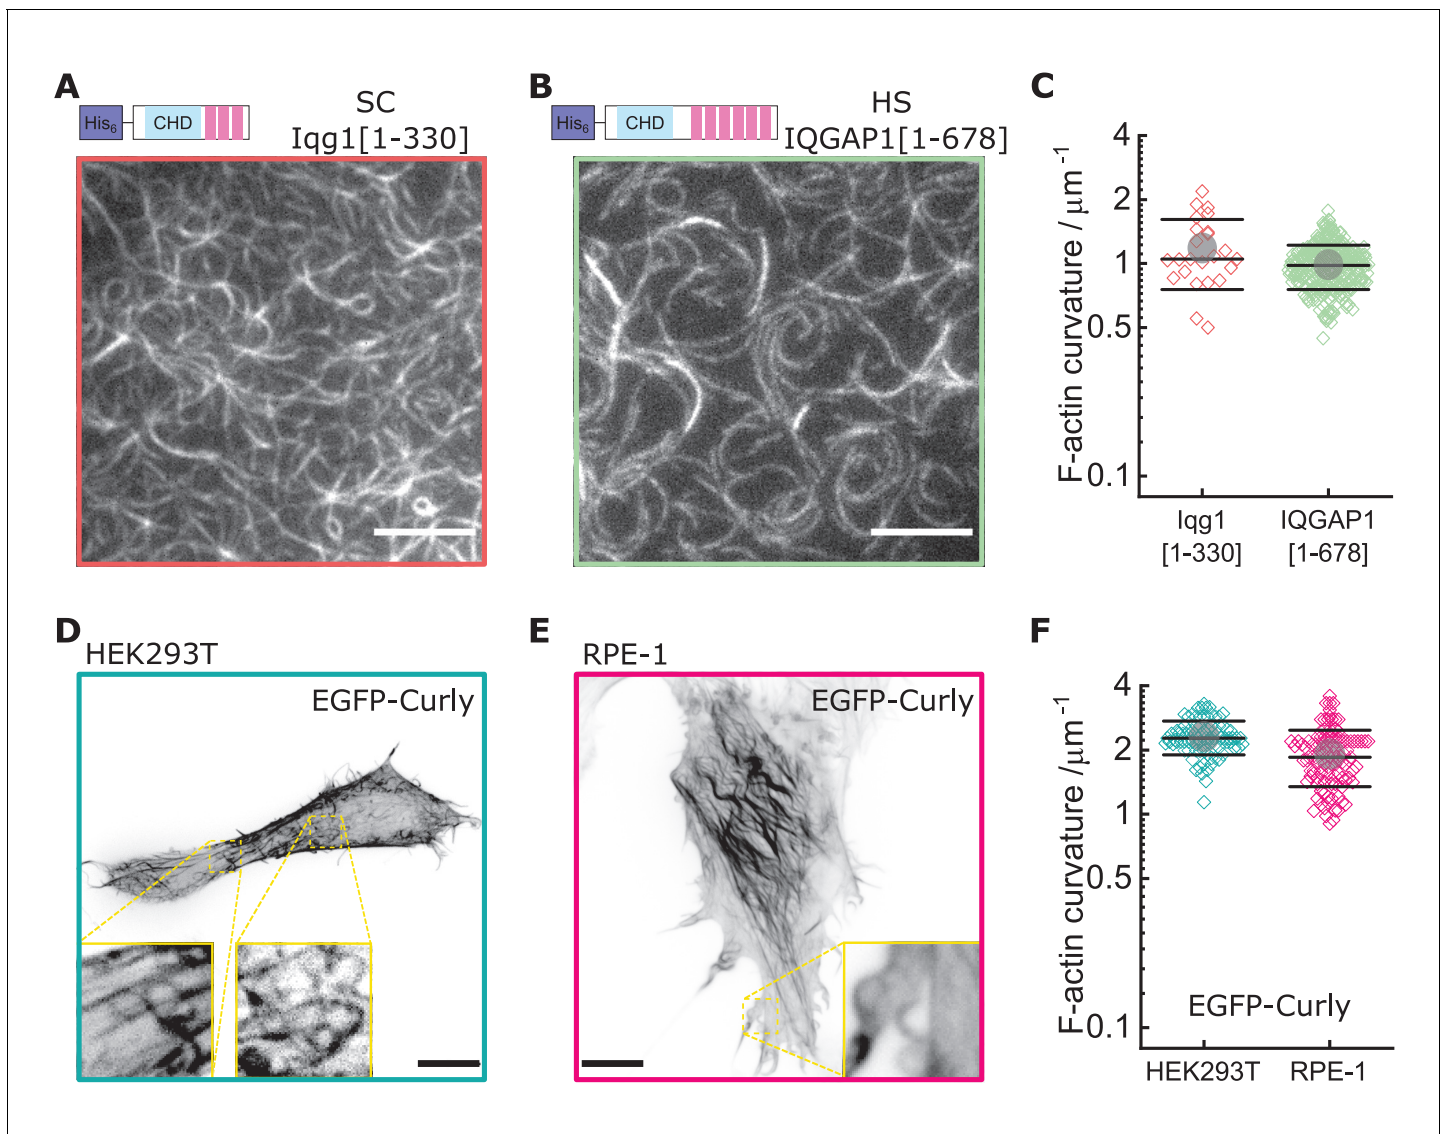

**Figure 4.** Curly effect is conserved among species and can foster actin bending in mammalian cells. (A) TIRF microscopy image of actin filaments (Alexa488) bound to membrane tethered His<sub>6</sub>-Iqg1(1-330) (*S. cerevisiae*); image shows 1/9 of the field of view, scale bar: 5  $\mu\text{m}$ . (B) TIRF microscopy image of actin filaments (Alexa488) bound to membrane tethered His<sub>6</sub>-IQGAP1(1-678) (*H. sapiens*); image shows 1/9 of the field of view, scale bar: 5  $\mu\text{m}$ . (C) Curvature measurements of actin filament rings and curved segments; shown are the individual data points and their mean  $\pm$  s.d.; Iqg1(1-330) (orange): N = 110 from three field of views of each of three individual experiments; IQGAP1(1-678) (green): N = 407 from 20 field of views of three individual experiments. (D) Confocal microscopy image (maximum intensity projection of the basal cell section) of a HEK293T cell transfected with EGFP-Rng2(1-189), inset shows zoom of dashed box; scale bar: 5  $\mu\text{m}$ . (E) Confocal microscopy image (maximum intensity projection of the basal cell section) of a RPE-1 cell transfected with EGFP-Rng2(1-189), inset shows zoom of dashed box; scale bar: 5  $\mu\text{m}$ . (F) Curvature measurements of actin filament rings and curved segments found in EGFP-Rng2(1-189) expressing cells; shown are the individual data points and their mean  $\pm$  s.d.; HEK293T (teal): N 91 from 14 cells of two independent experiments; REP-1 (fuchsia): N = 113 from 11 cells of two independent experiments.



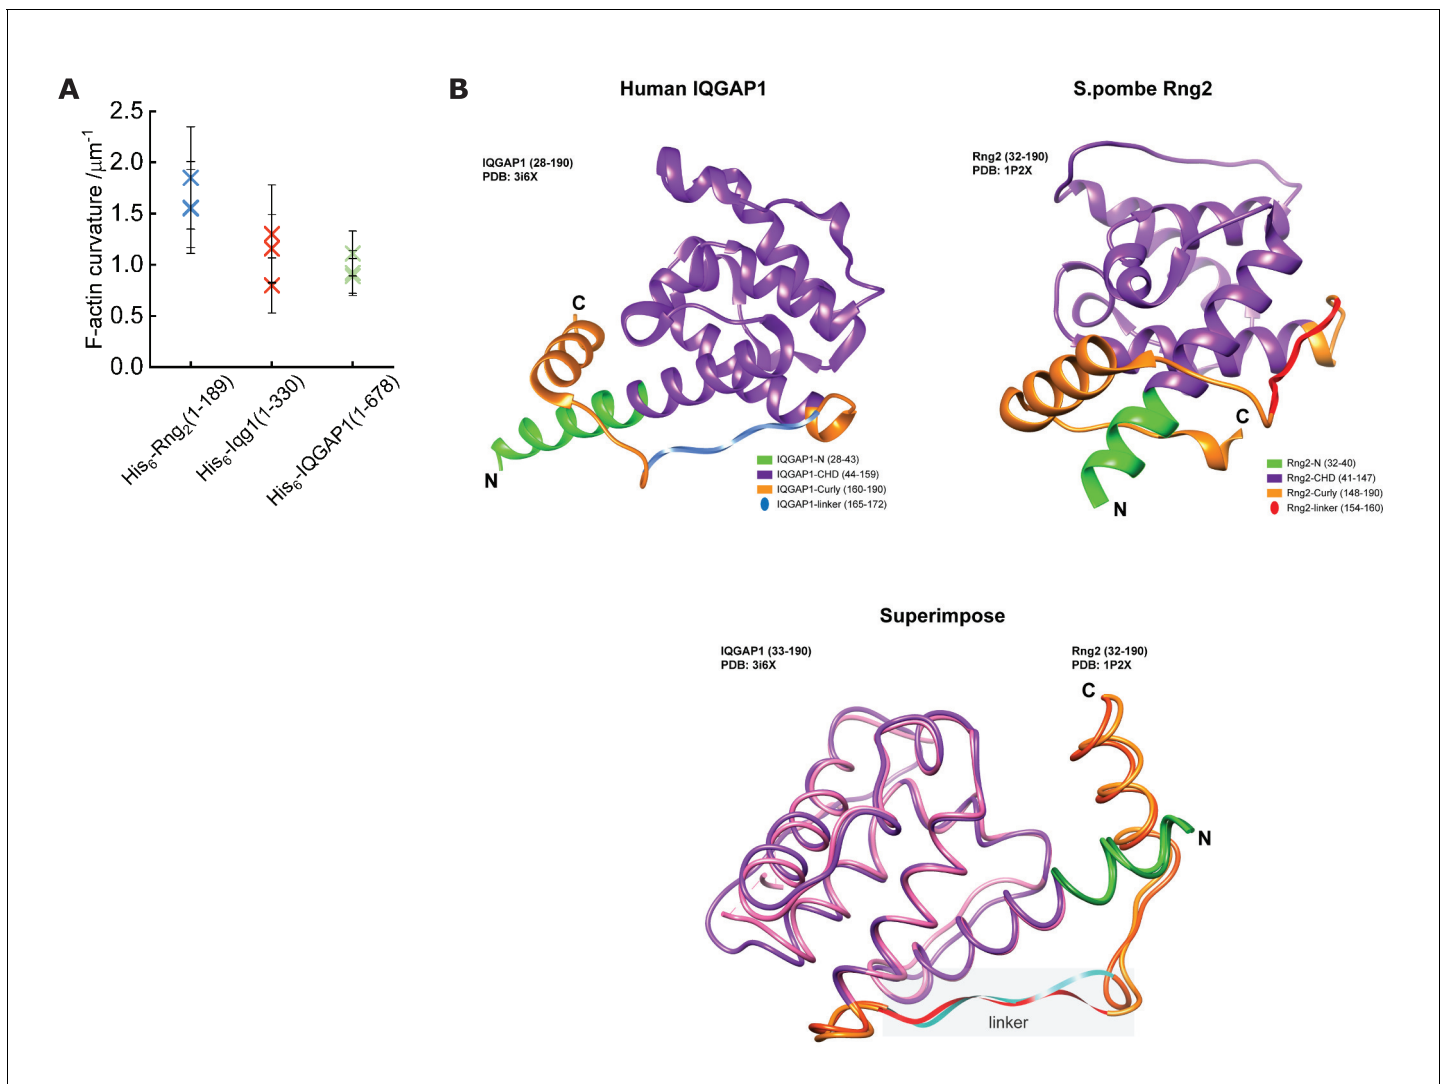

**Figure 4—figure supplement 1.** The structures of *S. Pombe* Rng2(21-190) and *H. Sapiens* IQGAP1(28-290) are very similar. (A) Comparison of mean actin ring curvatures of individual experiments induced by His<sub>6</sub>-Rng2(1-189) (data from **Figure 1C**), His<sub>6</sub>-lqg1(1-330) and His<sub>6</sub>-IQGAP1(1-678) (data from **Figure 4C**). (B) Depiction of structure predictions and overlay of *H. sapiens* IQGAP1(28-190) and *S. pombe* Rng2(32-190) indicating the strong similarity between the linker regions of both proteins that are thought to be important for actin bending.

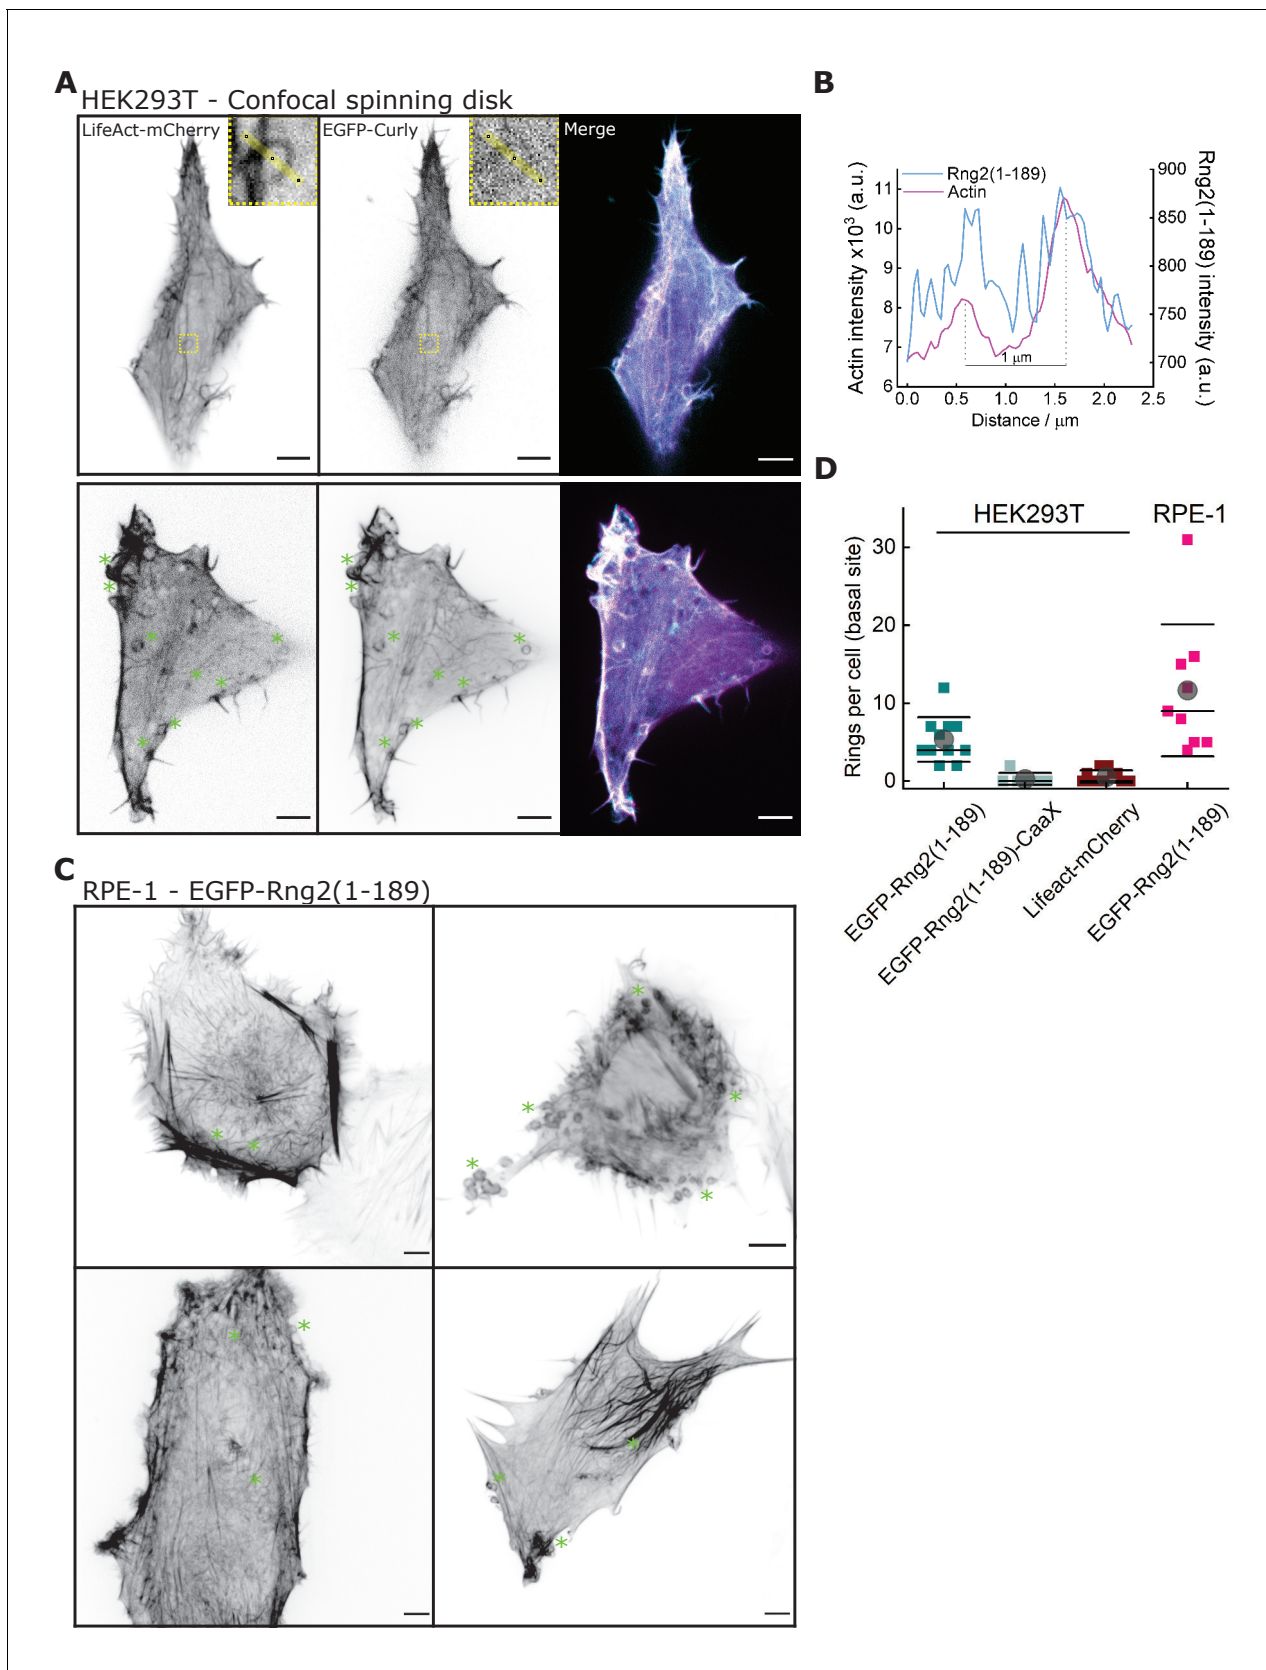

**Figure 4—figure supplement 2.** Curly induces actin rings in mammalian cells. (A) Confocal microscopy images of HEK293T cells transfected with LifeAct-mCherry (magenta) and EGFP-Rng2(1-189) (cyan); inset shows a ring structure showing both LifeAct and curly labeling; green stars indicate Figure 4—figure supplement 2 continued on next page

Figure 4—figure supplement 2 continued

location of ring structures; images show maximum intensity projection of the basal cell section of  $\sim 2 \mu\text{m}$ ; scale bar  $5 \mu\text{m}$ . (B) Line scan of the ring in (A) depicting the intensity profile of LifeAct-mCherry and EGFP-Rng2(1-189). (C) Confocal microscopy images of RPE-1 cells transfected with EGFP-Rng2(1-189); green stars indicate location of ring structures; images show maximum intensity projection of the basal cell section of  $\sim 2 \mu\text{m}$ ; scale bar  $5 \mu\text{m}$ . (D) Quantification of actin rings found in the basal section of cells expressing EGFP-Rng2(1-189), EGFP-Rng2(1-189)-CaaX or LifeAct-mCherry only; each data point corresponds to one cell.

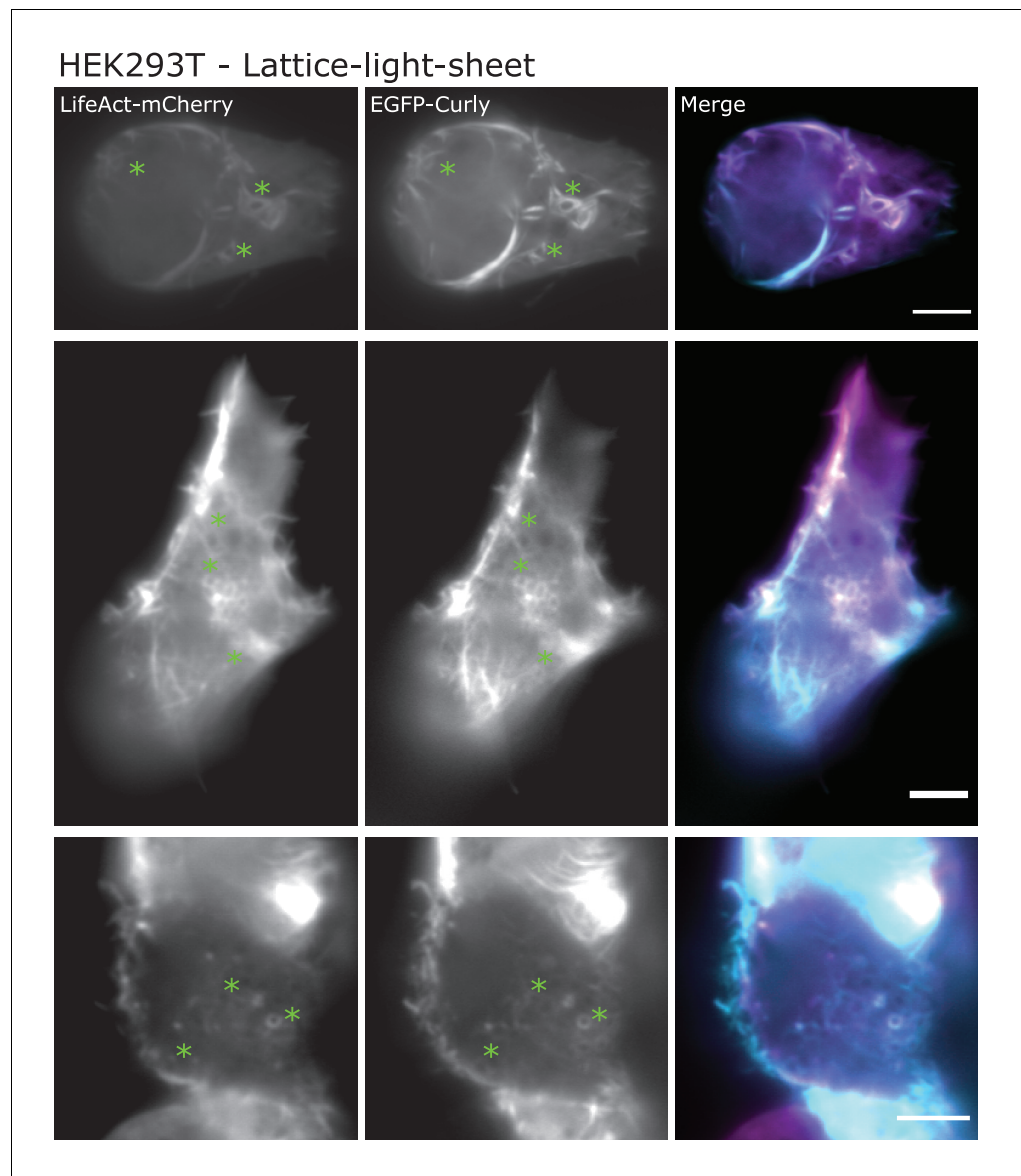

**Figure 4—figure supplement 3, Curly induces highly curved actin filaments inside cells.** Lattice-light-sheet microscopy images (maximum intensity projections of middle or basal section) of HEK293T cells transfected with LifeAct-mCherry (magenta) and EGFP-Rng2(1-189) (cyan); green stars indicate location of ring structures; scale bar: 5  $\mu\text{m}$ .

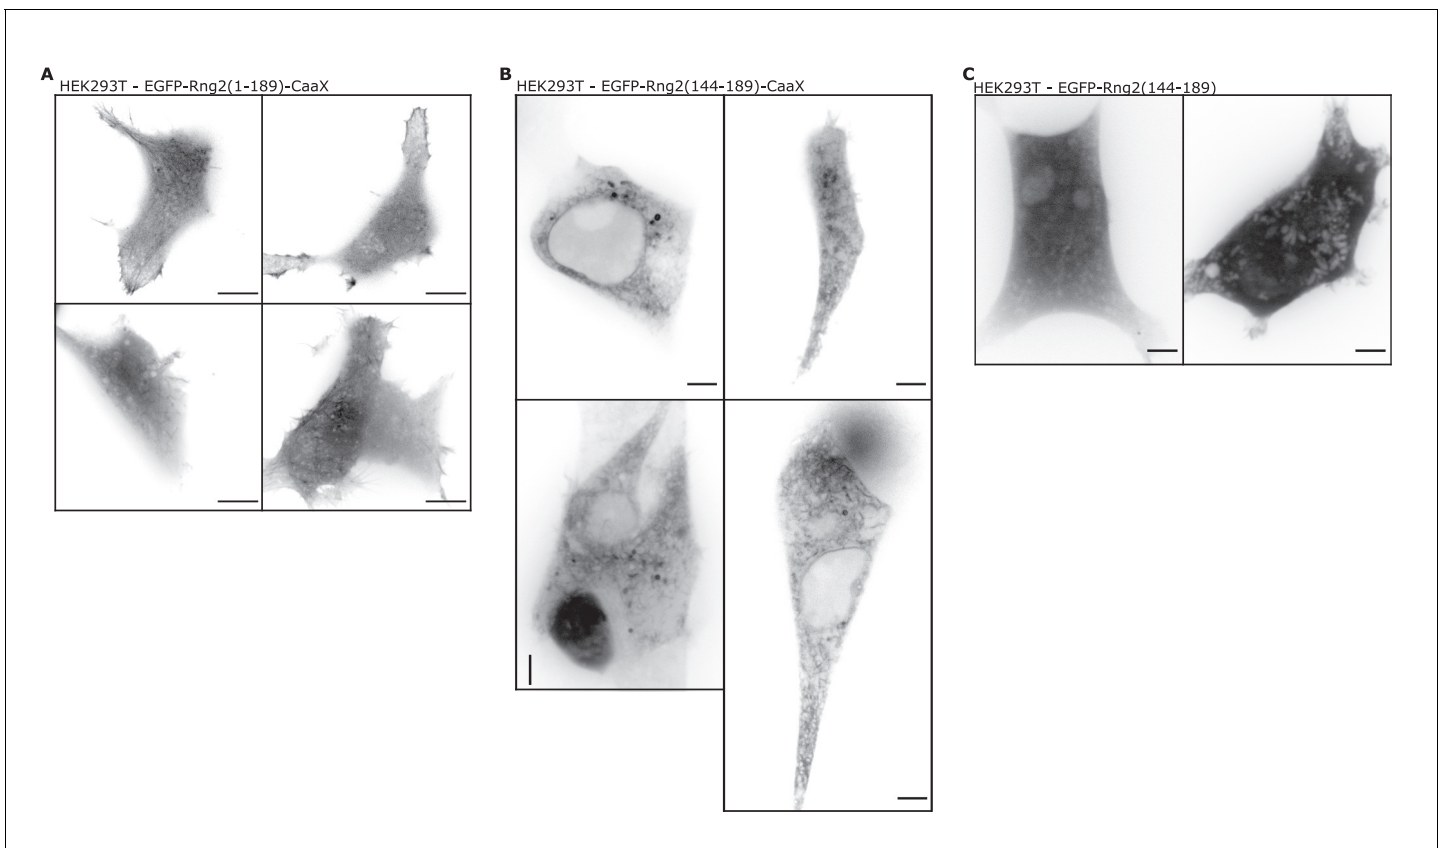

**Figure 4—figure supplement 4.** Addition of a CAAX domain to address curly to the plasma membrane is contraproductive. (A) Confocal microscopy images of HEK293T cells transfected with EGFP-Rng2(1-189)-CaaX; images show maximum intensity projection of the basal cell section ( $\sim 2 \mu\text{m}$ ); scale bar  $5 \mu\text{m}$ . (B) Confocal microscopy images of HEK293T cells transfected with EGFP-Rng2(144-189)-CaaX; images show maximum intensity projection of the basal cell section ( $\sim 2 \mu\text{m}$ ); scale bar  $5 \mu\text{m}$ . (C) Confocal microscopy Example images of HEK293T cells transfected with EGFP-Rng2(144-189); images show maximum intensity projection of the basal cell section ( $\sim 2 \mu\text{m}$ ); scale bar  $5 \mu\text{m}$ .
