# Supplementary material for: Calponin-homology domain mediated bending of membrane-associated actin filaments
Source: eLife. 2021 Jul 16;10:e61078. doi: 10.7554/eLife.61078 (PMC8315802; doi:10.7554/eLife.61078)
Supplement: Supplementary file 1. [file elife-61078-supp1.xlsx]

## Sheet: Sheet1
Experiment	Curvature C (μm-1)	Rings / FoV	p Value (C = CHis6-Rng2(1-189))
SLB + His6-Rng2(1-189)	1.7 (± 0.5)	21 (± 7)	1
glass + His6-Rng2(1-189)	0.6 (± 0.3)	0.5 (± 0.7)	0.003
SLB + Rng2(1-189)-His6	1.4 (± 0.4)	24 (± 6)	0.08
SLB + His6-Rng2(1-189) + His6-Formin	1.7 (± 0.4)	76 (± 34)	0.7
SLB + His6-Rng2(1-189) + Tropomyosin-actin	1.4 (± 0.6)	33 (± 7)	0.3
SLB + His6-Rng2(1-189) + Fimbrin-actin	0.6 (± 0.4)	3 (± 2)	0.0005
SLB + His6-Rng2(1-189) + Myosin II	2.8 (± 0.7)	95 (± 18)	0.0006
SLB + His6-Iqg1(1-330) (S.C.)	1.1 (± 0.4)	9 (± 6)	0.03
SLB + His6-IQGAP1(1-678) (H.S.)	1.0 (± 0.2)	13 (± 5)	0.005
HEK293T + EGFP-Rng2(1-189)	2.3 (± 0.4)	5 (±3)	N.A.
RPE-1 + EGFP-Rng2(1-189)	1.9 (± 0.6)	12 (±8)	N.A.
SLB +α-actinin-His6	0.3 (± 0.1)	N.A.	N.A.
SLB + His10-SNAP-EzrinABD	0.5 (± 0.3)	N.A.	N.A.
